# Supplementary material
Source: PubMed Central journal article supplement (PMC3651492)
Supplement: 1305859110_pnas.201305859SI.pdf [file 1305859110_pnas.201305859SI.pdf]

# Supporting Information

Aida et al. 10.1073/pnas.1305859110

## SI Materials and Methods

**Cell Culture.** Human Burkitt's lymphoma (BL)2 cells were cultured in RPMI medium 1640 (Invitrogen) supplemented with 10% (vol/vol) FBS and penicillin-streptomycin. The BL2 cell lines used in this study were established and maintained as described (1, 2). Splenocytes were isolated from the spleens of wild-type C57BL/6 mice and cultured for 2 d with lipopolysaccharide before being used for ChIP assays.

**Expression Level Analysis by Quantitative RT-PCR.** To analyze the mRNA expression levels of genes of interest, the total RNA was purified with TRIzol reagent (Invitrogen) and subjected to one-step quantitative RT-PCR analysis with the QuantiTect SYBR Green RT-PCR kit (Qiagen) and the Applied Biosystems 7500 Fast Real-Time PCR system. The relative expression level was calculated with the  $\Delta\Delta C_t$  method, using GAPDH mRNA expression as an internal control. The sequences of the primers are shown in Table S4.

1. Kobayashi M, et al. (2011) Decrease in topoisomerase I is responsible for activation-induced cytidine deaminase (AID)-dependent somatic hypermutation. *Proc Natl Acad Sci USA* 108(48):19305–19310.
2. Okazaki IM, et al. (2011) Histone chaperone Spt6 is required for class switch recombination but not somatic hypermutation. *Proc Natl Acad Sci USA* 108(19):7920–7925.

**Western Blot.** Cells were lysed with RIPA buffer (10 mM Tris-HCl pH 7.9, 150 mM NaCl, 0.1% SDS, 0.1% deoxycholate, 1% TritonX-100, and 1 mM EDTA) and were subjected to Western blot following standard protocols. Information about the antibodies used is in Table S7.

**Cell Cycle Analysis.** Cells were fixed with 70% ethanol at 4 °C for 30 min followed by RNaseA treatment and 50  $\mu\text{g}/\text{mL}$  propidium iodide staining and were analyzed by flow cytometry with Cell Quest software (BD).

**Chromatin Immunoprecipitation Assay.** The chromatin immunoprecipitation (ChIP) assay was performed as described previously (3). The primers and antibodies used for the ChIP assay are shown in Tables S6 and S7, respectively. Note that the lamin B2 (*Lmnb2*) intergenic primer set was designed by Tan et al. as a negative control for the structure specific recognition protein 1 (SSRP1) ChIP experiment (4).

3. Oshima S, et al. (2004) Interferon regulatory factor 1 (IRF-1) and IRF-2 distinctively up-regulate gene expression and production of interleukin-7 in human intestinal epithelial cells. *Mol Cell Biol* 24(14):6298–6310.
4. Tan BC, Chien CT, Hirose S, Lee SC (2006) Functional cooperation between FACT and MCM helicase facilitates initiation of chromatin DNA replication. *EMBO J* 25(17):3975–3985.







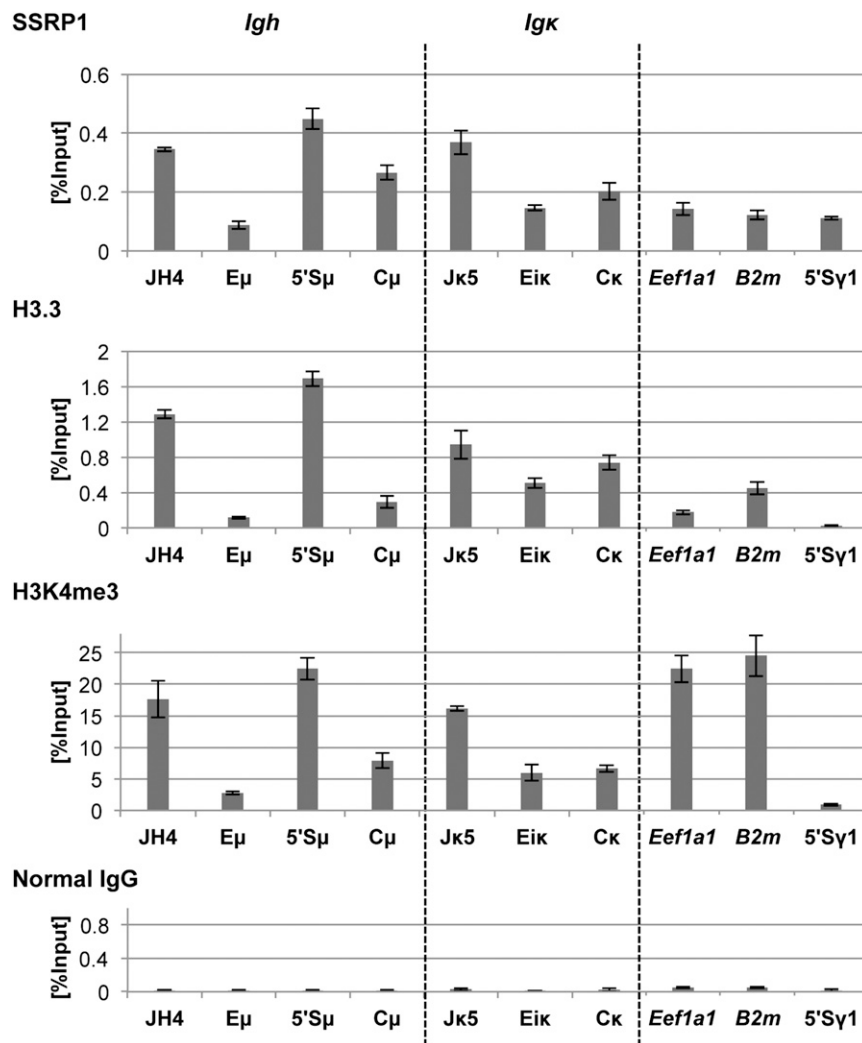

**Fig. S4.** The “facilitates chromatin transcription” (FACT) complex and histone H3.3 enrichment on the heavy and light chain genes in mouse primary B cells. Splenocytes were isolated from wild-type C57BL/6 mice and subjected to ChIP assays after being incubated with LPS for 2 d to ensure that the B cells became the predominant population. The chromatin occupancies of SSRP1, H3.3, and the trimethylation on histone H3K4 (H3K4me3) in the indicated regions are shown in individual graphs. Normal IgG was used to evaluate the background signal level. Data are the mean and SD of three independent experiments. Note that the heavy chain JH4 and the kappa light chain J $\kappa$ 5 segments are the closest genomic regions to the rearranged variable regions in *Igh* and the immunoglobulin kappa light chain gene (*Igk*), respectively. We chose the *Igk* locus for light chain gene analysis because it is expressed in ~95% of the B cells in C57BL/6 mice (1).

1. Durdik J, Moore MW, Selsing E (1984) Novel kappa light-chain gene rearrangements in mouse lambda light chain-producing B lymphocytes. *Nature* 307(5953):749–752.

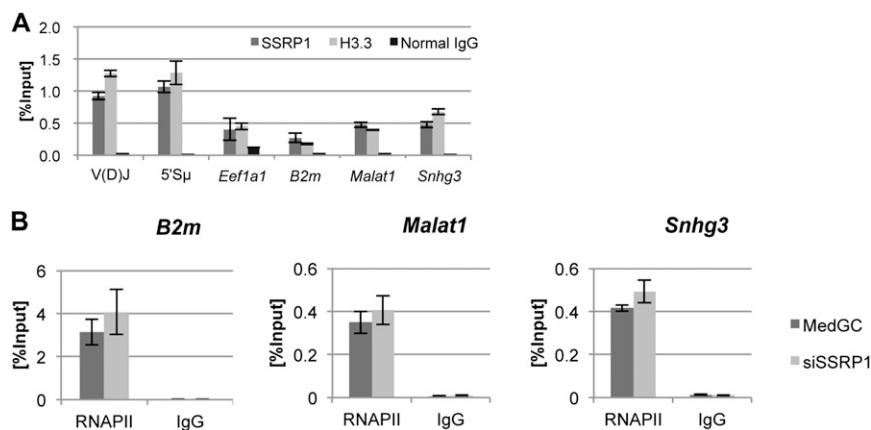

**Fig. S5.** Supporting ChIP results for Fig. 5. (A) FACT and H3.3 occupancies in AID-ER BL2 cells. (B) RNAPII occupancy on the non-Ig genes used for mutation analysis. Immunoprecipitated DNA by an anti-RNA polymerase II (RNAPII) antibody and normal IgG prepared in the experiment shown in Fig. 3B were used for this test. All data in this figure are the mean  $\pm$  SD from three independent analyses.

**Table S1.** Data for the SHM sequencing analysis shown in Fig. 5

| Analyzed region | AID type   | Samples      | Mutations | Total base no. | Mutated/total clones | Mutation frequency<br>( $\times 10^{-4}$ mutations per base) |
|-----------------|------------|--------------|-----------|----------------|----------------------|--------------------------------------------------------------|
| VDJ region      | JP8Bdel-ER | MedGC OHT-   | 3         | 50,932         | 3/68                 | 0.5890                                                       |
|                 |            | MedGC OHT+   | 39        | 86,135         | 32/115               | 4.528                                                        |
|                 |            | siSSRP1 OHT+ | 20        | 92,127         | 18/123               | 2.171                                                        |
|                 | AID-ER     | MedGC OHT-   | 0         | 44,191         | 0/59                 | <2.263                                                       |
|                 |            | MedGC OHT+   | 9         | 77,896         | 9/104                | 1.155                                                        |
|                 |            | siSSRP1 OHT+ | 2         | 77,896         | 2/104                | 0.2568                                                       |
| $S\mu$ region   | JP8Bdel-ER | MedGC OHT-   | 5         | 36,834         | 4/42                 | 1.357                                                        |
|                 |            | MedGC OHT+   | 68        | 60,513         | 36/69                | 11.24                                                        |
|                 |            | siSSRP1 OHT+ | 51        | 64,898         | 34/74                | 7.858                                                        |
|                 | AID-ER     | MedGC OHT-   | 0         | 35,957         | 0/41                 | <2.781                                                       |
|                 |            | MedGC OHT+   | 39        | 69,283         | 26/79                | 5.629                                                        |
|                 |            | siSSRP1 OHT+ | 9         | 64,021         | 8/73                 | 1.406                                                        |
| <i>Eef1a1</i>   | JP8Bdel-ER | MedGC OHT-   | 1         | 39,117         | 1/39                 | 0.2556                                                       |
|                 |            | MedGC OHT+   | 14        | 44,132         | 9/44                 | 3.172                                                        |
|                 |            | siSSRP1 OHT+ | 1         | 41,123         | 1/41                 | 0.2432                                                       |
|                 | AID-ER     | MedGC OHT-   | 2         | 52,156         | 2/52                 | 0.3834                                                       |
|                 |            | MedGC OHT+   | 3         | 53,159         | 3/53                 | 0.5643                                                       |
|                 |            | siSSRP1 OHT+ | 0         | 59,177         | 0/59                 | <0.1690                                                      |
| <i>B2m</i>      | JP8Bdel-ER | MedGC OHT-   | 0         | 40,432         | 0/38                 | <0.2473                                                      |
|                 |            | MedGC OHT+   | 0         | 40,432         | 0/38                 | <0.2473                                                      |
|                 |            | siSSRP1 OHT+ | 1         | 39,368         | 1/37                 | 0.2540                                                       |
|                 | AID-ER     | MedGC OHT-   | 1         | 41,496         | 1/39                 | 0.2410                                                       |
|                 |            | MedGC OHT+   | 1         | 46,816         | 1/44                 | 0.2136                                                       |
|                 |            | siSSRP1 OHT+ | 0         | 44,688         | 0/42                 | <0.2238                                                      |
| <i>Malat1</i>   | JP8Bdel-ER | MedGC OHT-   | 3         | 25,850         | 3/47                 | 1.161                                                        |
|                 |            | MedGC OHT+   | 20        | 25,300         | 13/46                | 7.905                                                        |
|                 |            | siSSRP1 OHT+ | 8         | 25,300         | 7/46                 | 3.162                                                        |
|                 | AID-ER     | MedGC OHT-   | 0         | 23,650         | 0/43                 | <0.4228                                                      |
|                 |            | MedGC OHT+   | 1         | 25,850         | 1/47                 | 0.3868                                                       |
|                 |            | siSSRP1 OHT+ | 1         | 25,300         | 1/46                 | 0.3953                                                       |
| <i>Snhg3</i>    | JP8Bdel-ER | MedGC OHT-   | 0         | 23,364         | 0/44                 | <0.4280                                                      |
|                 |            | MedGC OHT+   | 18        | 28,674         | 15/54                | 6.277                                                        |
|                 |            | siSSRP1 OHT+ | 7         | 29,205         | 7/55                 | 2.397                                                        |
|                 | AID-ER     | MedGC OHT-   | 0         | 20,709         | 0/39                 | <0.4829                                                      |
|                 |            | MedGC OHT+   | 1         | 22,833         | 1/43                 | 0.4380                                                       |
|                 |            | siSSRP1 OHT+ | 0         | 24,426         | 0/46                 | <0.4094                                                      |

JP8Bdel-ER, a C-terminally truncated AID mutant (JP8Bdel) fused with the estrogen-binding domain; *B2m*, beta-2 microglobulin; *Eef1a1*, eukaryotic translation elongation factor 1 alpha 1; *Malat1*, metastasis associated lung adenocarcinoma transcript 1; *Snhg3*, small nucleolar RNA host gene 3;  $S\mu$ , the  $S\mu$  switch region.

**Table S2. Spt5-depletion blocked SHM in the HygGFP gene in the sequencing analysis**

| Sample        | Mutations | Total base no. | Mutated/ total clones | Mutation frequency<br>( $\times 10^{-4}$ mutations per base) |
|---------------|-----------|----------------|-----------------------|--------------------------------------------------------------|
| MedGC OHT-    | 0         | 48,960         | 0/30                  | <0.204                                                       |
| MedGC OHT+    | 45        | 48,960         | 20/30                 | 9.19                                                         |
| siSpt5#2 OHT- | 1         | 40,800         | 0/25                  | 0.245                                                        |
| siSpt5#2 OHT+ | 16        | 48,960         | 12/30                 | 3.27                                                         |

The effect of Spt5-depletion on mutation frequency in HygGFP was tested as the same to the SSRP1-depletion in Fig. 2. The *P* value for the significance of reduction by Spt5 knockdown is *P* = 0.00013 (Fisher's exact test). Knockdown efficiency of the siSpt5#2 oligonucleotide is shown in Fig. S1.

**Table S3. Stealth siRNA oligonucleotides**

| siRNA name    | Stealth siRNA official ID |
|---------------|---------------------------|
| CSB#1         | HSS103357                 |
| CSB#2         | HSS103358                 |
| CSB#3         | HSS103359                 |
| Spt5#1        | HSS110371                 |
| Spt5#2        | HSS110372                 |
| Spt5#3        | HSS110373                 |
| ELL#1         | HSS112024                 |
| ELL#2         | HSS112025                 |
| ELL#3         | HSS112026                 |
| TCEB3#1       | HSS110530                 |
| TCEB3#2       | HSS110531                 |
| TCEB3#3       | HSS110532                 |
| SSRP1#1       | HSS110245                 |
| SSRP1#2       | HSS110246                 |
| SSRP1#3       | HSS110247                 |
| RDBP#1        | HSS111862                 |
| RDBP#2        | HSS111863                 |
| RDBP#3        | HSS111864                 |
| Ctr9#1        | HSS114421                 |
| Ctr9#2        | HSS114422                 |
| Ctr9#3        | HSS114423                 |
| SII#1         | HSS110525                 |
| SII#2         | HSS110526                 |
| SII#3         | HSS186223                 |
| Spt6#1        | HSS110374                 |
| Spt6#2        | HSS110375                 |
| Spt6#3        | HSS110376                 |
| Spt16#1       | HSS117400                 |
| Spt16#2       | HSS117401                 |
| Spt16#3       | HSS117402                 |
| TafSF1#1      | HSS120649                 |
| TafSF1#2      | HSS120650                 |
| TafSF1#3      | HSS120651                 |
| Rap30#1       | HSS104572                 |
| Rap30#2       | HSS104573                 |
| Rap30#3       | HSS104574                 |
| Hpr1#1        | HSS115144                 |
| Hpr1#2        | HSS115145                 |
| Hpr1#3        | HSS115146                 |
| Histone H3.3A | NM_002107_stealth_76      |
| Histone H3.3B | NM_005324_stealth_817     |
| SSRP1(m)#1    | MSS209558                 |
| SSRP1(m)#2    | MSS209559                 |
| SSRP1(m)#3    | MSS277353                 |

Invitrogen's official ID number for each oligo is shown. Note that siRNAs for histone H3.3A and -B were designed at their unique untranslated regions to avoid cross-reaction to the normal histone H3 genes.

**Table S4. Sequences of the primers used for qRT-PCR analysis**

| Primer set name  | Forward                   | Reverse                |
|------------------|---------------------------|------------------------|
| CSB              | GGGCACCATTTGAAGAAAAGA     | TGTTTCAGTGTCTGGGATG    |
| DSIF (Spt5)      | CATCGGTGTGGTGAAGATG       | GTCCATCCCATAGTTCGAGGT  |
| ELL              | ACCCAGGTTTAAACGGAAAC      | TGTACTCGGCATTGAAGTCG   |
| Elongin (TCEB3)  | AAGCTGAGAAAAGGTGCCTGA     | TCTTCTGGGGTGAAGAGAA    |
| FACT (SSRP1)     | GAAGAAAGAGGAGTGGGATCG     | GCGTGGATTTCTTTCCATC    |
| NELF (RDBP)      | ACACAGCCACAGCAACAGAG      | CTGGAAAGTGGGACTGGT     |
| Paf (Ctr9)       | CCAATGGCATAGGAGCTGTT      | GCGCTGATGTACTGCTTTTG   |
| SII              | CGGCAATGTAAGCAACAGAA      | GTTCGAAGAGTGCAGCAAG    |
| Spt6             | GCCAGAAGAACGAGTGAAGG      | TAGGTGTCTTTGGGCAGCTT   |
| TatSF1           | CCATGAGCGAGTTGTCATCA      | ACACCATCTGGGTGCCTATC   |
| TFIIF (Rap30)    | TGGAAAACCAGCTTCAGTCA      | GTCGGCATTACAGTCTTTGT   |
| THO (Hpr1)       | AAGTTGCCCAAGTTTGTG        | TCAGGGCAAAGATTCCAAAG   |
| Histone H3.3A    | TAAAGCACCCAGGAAGCAAC      | GGGAAGTTTGGCAATCAGAA   |
| Histone H3.3B    | AGGAAAAGCGCTCCCTCTAC      | ATCTCCCTCACCACCTCTG    |
| Spt16            | TGCCATCACACTGCTAATACG     | GGCAGTCATTCCAGCTCTTC   |
| Igh in BL2 cells | CTAATTACTACTTGAGTTGGATCCG | TCAGTTTCAGGGAGAATTGGTT |
| HygGFP           | GATGTAGGAGGCGTGGATA       | ATAGGTGAGGCTCTCGCTGA   |
| Gapdh            | ATCTGGGCTACACTGAGCA       | GGTGTCCAGGGTCTTACT     |

All sequences are from 5' end to 3' end. CSB, Cockayne syndrome B protein; DSIF, 5,6-dichloro-1-beta-D-ribofuranosylbenzimidazole sensitivity-inducing factor; Spt5, suppressor of Ty 5 homolog; ELL, eleven-nineteen lysine-rich leukemia protein; TCEB3, transcription elongation factor B polypeptide 3; NELF, negative elongation factor; RDBP, RD RNA binding protein; Paf, polymerase associated factor; Ctr9, Cln three-requiring protein 9; SII, transcription elongation factor TFIIIS; Spt6, suppressor of Ty 6 homolog; TatSF1, Tat specific factor 1; TFIIF, general transcription factor IIF; Rap30, RNA polymerase II associated protein 30; THO, suppressor of the transcriptional defect of Hpr1 by overexpression; Spt16, suppressor of Ty 16 homolog; Gapdh, glyceraldehyde-3-phosphate dehydrogenase.

**Table S5. Sequences of the primers used for the mutation analysis by sequencing**

| Target region        | Forward                                                                                  | Reverse                      |
|----------------------|------------------------------------------------------------------------------------------|------------------------------|
| HygGFP               | ATGTGTCGACACCATGAAAAAGCCTGAACTCAC<br>Position: +21 to +1678 from first ATG               | GCGGATCCTTACTTGTACAGCTCGTCCA |
| BL2 Igh VDJ          | ATCTCATGTGCAAGAAAATGAAA<br>Position: +7 to +755 from first ATG                           | AGTCCCACCACGCAATCAT          |
| 5'Sμ                 | GCTGCTGCATTTGCTTCTC<br>Position: 877 bp intronic region between Iμ<br>exon and Sμ repeat | GCCCAGTTCAGCCTTGTTTA         |
| Eef1a1               | CCGCCAGAACACAGGTAAGT<br>Position: +40 to +1042 from TSS                                  | CCCGAATCTACGTGTCCAAT         |
| Snhg3                | GCCCAGGAGTGACCTATACTCAA<br>Position: Described in Kato et al. (1).                       | GGTATCCACGTTGGAATGCTCA       |
| Malat1               | GGCAGAAGGCTTTTGAAGA<br>Described in Kato et al. (1).                                     | CAACATATTGCCACCTCAGGGAT      |
| B2m                  | CTGTGCTCGCGCTACTCTCT<br>Position: +113 to +1176 from TSS                                 | GGAAACAACCAGGCAAAGAG         |
| GFP in NTZ (Fig. S2) | TGACCTCCATAGAAGACCCG<br>Position: Described in Yoshikawa et al. (2).                     | TTATGTTTCAGGTTTCAGGGG        |

All sequences are from 5' end to 3' end. NTZ, NIH3T3-NTZ cells.

1. Kato L, et al. (2012) Nonimmunoglobulin target loci of activation-induced cytidine deaminase (AID) share unique features with immunoglobulin genes. *Proc Natl Acad Sci USA* 109(7): 2479–2484.
2. Yoshikawa K, et al. (2002) AID enzyme-induced hypermutation in an actively transcribed gene in fibroblasts. *Science* 296(5575):2033–2036.



**Table S6. Sequences of the primers used for ChIP assays**

| Primer set name                                  | Forward               | Reverse                    |
|--------------------------------------------------|-----------------------|----------------------------|
| <b>Primers for BL2 (human) ChIP experiments</b>  |                       |                            |
| V(D)J                                            | CACTGTGGGTTTTTCTGTTC  | CGGATCCAACCTCAAGTAGTAATTAG |
| Intron#1                                         | CTCAGGTGAGTCCTCACCAC  | AGTCCCACCACGCAATCAT        |
| Intron#2                                         | GTTTTCTGAGCATTGCAGGT  | TACAGACACCGCTCCTGAGA       |
| E $\mu$                                          | GGTCACCGCGAGAGTCTATT  | GAAACGCAAATGTCCAGGT        |
| 5'S $\mu$                                        | CCAGGTAGTGGAGGGTGGTA  | CAGCTAAAGCCATCTCATTGC      |
| 3'S $\mu$                                        | TGGGCCAATCTTCATGATCT  | CCAGCTCAGTCACACTCCAG       |
| C $\mu$                                          | GCAAGTCCAAGCTCATCTGC  | TGGTCACCTTGATAGTCTGTG      |
| Eef1a1                                           | CCGCCAGAACACAGGTAAGT  | ACTCTCCCACCCTTCCA          |
| B2m                                              | CTGTGCTCGCGCTACTCTCT  | CTTGGAGAAGGGAAGTCACG       |
| Odf4                                             | TGGGGCCTTCTCTGGAT     | CTGTCTCCCCTTCCCTCAC        |
| Lmnb2 intergenic                                 | AAACGTGACCTCAGACAGAGC | CTGGCAGGTCTGGACTATG        |
| Malat1 hotspot                                   | TGACCCAGGTGCTACACAGA  | GGCTCCTGGACTCTTTTCCT       |
| Snhg3 hotspot                                    | GGAGCCCAGGATGACCTAT   | CCTTAACAAATCCTGCAAAACA     |
| <b>Primers for mouse spleen ChIP experiments</b> |                       |                            |
| JH4                                              | AGAATGGCCTCTCCAGGTCT  | AAGGCTCTGAGATCCCCTAGACA    |
| E $\mu$                                          | AGGTCATGTGGCAAGGCTAT  | TTACCCAGGTGGTGTTTTGC       |
| 5'S $\mu$                                        | GCCCTAGTAAGCGAGGCTCT  | CCCAGCTCATTCAGTTCAT        |
| C $\mu$                                          | CAGCACCATTTCTTCACT    | ACCTTCAAGGATGCTCTTGG       |
| J $\kappa$                                       | GAGAAAATGGAGAGGGCTCA  | TCCAATCTCTTGGATGGTGA       |
| iE $\kappa$                                      | TCCCTAGCCAAAGGCAACTA  | AGAATTATGAGCAGCCTTTCC      |
| C $\kappa$                                       | TATCCATCTTCCACCATCC   | ACTGTTCAGGACGCCATTTT       |
| 5'Sg1                                            | TAAGAACATGGGAGCAGGA   | TACTCCCCTGGTCCCCTACC       |
| Eef1a1                                           | AGTCGCCTTGGACGTTCTT   | GGGAATGCTCGCAGCTAAT        |
| B2m                                              | TGGTGCTTGTCTCACTGACC  | CCACTCCTTTCCCAGAGAC        |

All sequences are from 5' end to 3' end. Odf4, outer dense fiber of sperm tails 4; iE $\kappa$ , intronic enhancer of the kappa light chain gene; 5'Sg1, 5' flanking sequence of the S gamma 1 switch region.

**Table S7. Antibody information**

| Antigen          | Host   | Company            | Product no.                                       |
|------------------|--------|--------------------|---------------------------------------------------|
| SSRP1 (10D1)     | Mouse  | BioLegend          | 609702                                            |
| Spt16            | Goat   | Sigma-Aldrich      | SAB2500377                                        |
| H3.3             | Rabbit | Abcam              | ab62642                                           |
| H3K4me3          | Rabbit | ActiveMotif        | 39159                                             |
| H3               | Rabbit | ActiveMotif        | 39163                                             |
| RNAPII (H-224)   | Rabbit | Santa Cruz         | sc9001                                            |
| Spt5             | Rabbit | Gift from H. Handa | Tokyo Institute of Technology,<br>Yokohama, Japan |
| Normal mouse IgG | Mouse  | Santa Cruz         | sc2025                                            |
